# Supplementary material
Source: PubMed Central journal article supplement (PMC8038971)
Supplement: NIHMS1665600-supplement-1665600_ReportingSummary.pdf [file NIHMS1665600-supplement-1665600_ReportingSummary.pdf]

## Reporting Summary

Nature Research wishes to improve the reproducibility of the work that we publish. This form provides structure for consistency and transparency in reporting. For further information on Nature Research policies, see our [Editorial Policies](#) and the [Editorial Policy Checklist](#).

### Statistics

For all statistical analyses, confirm that the following items are present in the figure legend, table legend, main text, or Methods section.

n/a Confirmed

- The exact sample size ( $n$ ) for each experimental group/condition, given as a discrete number and unit of measurement
- A statement on whether measurements were taken from distinct samples or whether the same sample was measured repeatedly
- The statistical test(s) used AND whether they are one- or two-sided  
*Only common tests should be described solely by name; describe more complex techniques in the Methods section.*
- A description of all covariates tested
- A description of any assumptions or corrections, such as tests of normality and adjustment for multiple comparisons
- A full description of the statistical parameters including central tendency (e.g. means) or other basic estimates (e.g. regression coefficient) AND variation (e.g. standard deviation) or associated estimates of uncertainty (e.g. confidence intervals)
- For null hypothesis testing, the test statistic (e.g.  $F$ ,  $t$ ,  $r$ ) with confidence intervals, effect sizes, degrees of freedom and  $P$  value noted  
*Give  $P$  values as exact values whenever suitable.*
- For Bayesian analysis, information on the choice of priors and Markov chain Monte Carlo settings
- For hierarchical and complex designs, identification of the appropriate level for tests and full reporting of outcomes
- Estimates of effect sizes (e.g. Cohen's  $d$ , Pearson's  $r$ ), indicating how they were calculated

*Our web collection on [statistics for biologists](#) contains articles on many of the points above.*

### Software and code

Policy information about [availability of computer code](#)

Data collection Raw data of high throughput sequencing were collect on Illumina Nextseq or Novaseq platforms with the default factory softwares.

Data analysis For dCas9 and Cas9 dense perturbation analysis, these softwares were used: DESeq2, R 4.0.1, CRISPR-SURF 1.0.  
For ChIP-seq, CUT&RUN, ATAC-seq analysis, FastQC 0.11.9, CUT&RUNTools, MANorm 1.1.4 and deeptools 2.0 were used. CUT&RUNTools integrates the following softwares: Trimmomatic 0.36, Bowtie 2.2.9, Samtools 1.3.1, Picard 2.8.0, MACS 2.1.1, MEME 4.12.0, Bedops 2.4.30, Bedtools 2.26.0.  
Statistic analysis of qPCR was carried out with GraphPad Prism 8.  
For PRO-seq analysis, Cutadapt 1.14, Bowtie 1.2.2, Samtools 1.3.1 were used. Custom scripts were used to quantify signals on each gene ([https://github.com/yao-qiuming/Nan\\_NG2020](https://github.com/yao-qiuming/Nan_NG2020)).  
For quantification of Cas9 editing or base editing efficiency, TIDE 3.2.0 and TIDER 1.0.2 were used.  
For flow cytometry analysis, FlowJo V10 was used.  
Western blot was quantified with ImageJ 2.0  
Genome tracks were viewed using IGV 2.7.0  
Protein Structure was visualized with PyMOL 1.8.6.1

For manuscripts utilizing custom algorithms or software that are central to the research but not yet described in published literature, software must be made available to editors and reviewers. We strongly encourage code deposition in a community repository (e.g. GitHub). See the Nature Research [guidelines for submitting code & software](#) for further information.

## Data

Policy information about [availability of data](#)

All manuscripts must include a [data availability statement](#). This statement should provide the following information, where applicable:

- Accession codes, unique identifiers, or web links for publicly available datasets
- A list of figures that have associated raw data
- A description of any restrictions on data availability

All raw and processed CRISPR screen, CUT&RUN, ChIP-seq, PRO-seq and ATAC-seq data have been deposited in the NCBI Gene Expression Omnibus under accession number GSE150530.

All unprocessed western blot gels for figure 4a, Extended Data Figures 2a, 4a, c, 5f can be found in Source Data.

## Field-specific reporting

Please select the one below that is the best fit for your research. If you are not sure, read the appropriate sections before making your selection.

- Life sciences       Behavioural & social sciences       Ecological, evolutionary & environmental sciences

For a reference copy of the document with all sections, see [nature.com/documents/nr-reporting-summary-flat.pdf](https://www.nature.com/documents/nr-reporting-summary-flat.pdf)

## Life sciences study design

All studies must disclose on these points even when the disclosure is negative.

|                 |                                                                                                                                                                                                                                                                                      |
|-----------------|--------------------------------------------------------------------------------------------------------------------------------------------------------------------------------------------------------------------------------------------------------------------------------------|
| Sample size     | High throughput experiments including PRO-seq, CUT&RUN were conducted in duplicates as indicated. No additional sample size calculation was performed. Two replicates are commonly used for high throughput sequencing experiments to ensure reproducibility while controlling cost. |
| Data exclusions | Base edited cells that showed insertion or deletions at the edited sites were considered not qualified and excluded from the downstream analysis in Figures 3c, g.<br>No other data were excluded from analysis.                                                                     |
| Replication     | Biological replicates were performed and indicated in Figure legends to ensure reproducibility of the key data.                                                                                                                                                                      |
| Randomization   | Samples were allocated based on genotypes only. There are no covariates and no randomization was required.                                                                                                                                                                           |
| Blinding        | All the data were generate by machines and do not involve human intervention of values. Therefore no blinding were performed.                                                                                                                                                        |

## Reporting for specific materials, systems and methods

We require information from authors about some types of materials, experimental systems and methods used in many studies. Here, indicate whether each material, system or method listed is relevant to your study. If you are not sure if a list item applies to your research, read the appropriate section before selecting a response.

### Materials & experimental systems

| n/a                                 | Involved in the study                                     |
|-------------------------------------|-----------------------------------------------------------|
| <input type="checkbox"/>            | <input checked="" type="checkbox"/> Antibodies            |
| <input type="checkbox"/>            | <input checked="" type="checkbox"/> Eukaryotic cell lines |
| <input checked="" type="checkbox"/> | <input type="checkbox"/> Palaeontology and archaeology    |
| <input checked="" type="checkbox"/> | <input type="checkbox"/> Animals and other organisms      |
| <input checked="" type="checkbox"/> | <input type="checkbox"/> Human research participants      |
| <input checked="" type="checkbox"/> | <input type="checkbox"/> Clinical data                    |
| <input checked="" type="checkbox"/> | <input type="checkbox"/> Dual use research of concern     |

### Methods

| n/a                                 | Involved in the study                              |
|-------------------------------------|----------------------------------------------------|
| <input type="checkbox"/>            | <input checked="" type="checkbox"/> ChIP-seq       |
| <input type="checkbox"/>            | <input checked="" type="checkbox"/> Flow cytometry |
| <input checked="" type="checkbox"/> | <input type="checkbox"/> MRI-based neuroimaging    |

## Antibodies

|                 |                                                                                                                                                                                                                                                                                                                                                                                                                            |
|-----------------|----------------------------------------------------------------------------------------------------------------------------------------------------------------------------------------------------------------------------------------------------------------------------------------------------------------------------------------------------------------------------------------------------------------------------|
| Antibodies used | BCL11A, ab191401, Abcam; NFYA, sc-17753, Santa Cruz Biotechnology; NFYA, ab139402, Abcam; TBP, ab220788, Abcam; $\alpha$ -Flag M2 antibody, F1804, Sigma-Aldrich; C/EBPB, NBP1-46179, NovusBio; C/EBPG, sc-517003, Santa Cruz Biotechnology; CDP, sc-514008, Santa Cruz Biotechnology; NFIA, HPA008884, Sigma-Aldrich; NFIC, A303-123A-T, Bethyl Laboratories; Histone H3, ab24834, Abcam; HbF, MHFH01, Life Technologies. |
| Validation      | Flag M2 antibody was validated by the manufacturer through immunostaining.<br>HbF antibody was validated by flow cytometry (Extended Data Figure 3g).                                                                                                                                                                                                                                                                      |

All other antibodies were validated by the manufacturers through western blot to confirm specific recognition of the human antigens. All WB images were shown in manufacturers' websites.

## Eukaryotic cell lines

Policy information about [cell lines](#)

Cell line source(s) HUDEP-2 cells, HUDEP-1 cells were established and shared by Nakamura group at RIKEN, Japan. 293T cells were purchased from ATCC.

Authentication These cells were not authenticated.

Mycoplasma contamination Cells were confirmed to be negative for Mycoplasma as determined by PCR.

Commonly misidentified lines (See [ICLAC](#) register) no commonly misidentified lines were used in this study

## ChIP-seq

### Data deposition

Confirm that both raw and final processed data have been deposited in a public database such as [GEO](#).

Confirm that you have deposited or provided access to graph files (e.g. BED files) for the called peaks.

Data access links <https://www.ncbi.nlm.nih.gov/geo/query/acc.cgi?acc=GSE150530>  
*May remain private before publication.* token: crmpygswtvipred

Files in database submission please see below in Methodology-Sequencing depth

Genome browser session [https://genome.ucsc.edu/s/nanliu/NFY\\_CUTRUN\\_for\\_NG](https://genome.ucsc.edu/s/nanliu/NFY_CUTRUN_for_NG)  
(e.g. [UCSC](#))

### Methodology

Replicates two replicates of CUT&RUN were performed for NFYA CUT&RUN or TBP CUT&RUN in CD34+ cells as indicated in the file names by "rep1" and "rep2". One experiment was done for those experiments without labeling "rep".

Sequencing depth All experiments were sequenced as paired end, with read length of 42 bp each strand. The numbers of total reads and concordantly aligned reads were listed below. (Uniquely mapped reads were not applicable to this project due to the fact that the HBG1 and HBG2 genes are duplicated.)  
NFYA\_ChIP\_BCLKOHDP2\_ctr,37164569,34771514  
NFYA\_ChIP\_BCLKOHDP2\_shNFYA,36723066,34500130  
NFYA\_ChIP\_HDP1\_ctr,42005143,39225567  
NFYA\_ChIP\_HDP1\_shNFYA,50820724,47620992  
NFYA\_ChIP\_HDP2\_ctr,34634556,32575748  
NFYA\_ChIP\_HDP2\_shNFYA,49777590,46855899  
NFYA\_CUTRUN\_BCLKOdCas9\_102\_rep1,33495349,30674512  
NFYA\_CUTRUN\_BCLKOdCas9\_102\_rep2,15000000,11920433  
NFYA\_CUTRUN\_BCLKOdCas9\_115\_rep1,36819206,33553876  
NFYA\_CUTRUN\_BCLKOdCas9\_115\_rep2,15000000,12138125  
NFYA\_CUTRUN\_BCLKOdCas9\_124\_rep1,38921171,35940594  
NFYA\_CUTRUN\_BCLKOdCas9\_124\_rep2,15000000,12697117  
NFYA\_CUTRUN\_BCLKOdCas9\_139\_rep1,33681061,30854506  
NFYA\_CUTRUN\_BCLKOdCas9\_139\_rep2,15000000,11807286  
NFYA\_CUTRUN\_BCLKOdCas9\_158\_rep1,39688300,35082998  
NFYA\_CUTRUN\_BCLKOdCas9\_158\_rep2,15000000,9213025  
NFYA\_CUTRUN\_BCLKOdCas9\_197\_rep1,41422415,37376825  
NFYA\_CUTRUN\_BCLKOdCas9\_197\_rep2,15000000,8202314  
NFYA\_CUTRUN\_BCLKOdCas9\_208\_rep1,46242216,42301794  
NFYA\_CUTRUN\_BCLKOdCas9\_208\_rep2,15000000,11279120  
NFYA\_CUTRUN\_BCLKOdCas9\_62\_rep1,32979815,30333424  
NFYA\_CUTRUN\_BCLKOdCas9\_62\_rep2,15000000,12421347  
NFYA\_CUTRUN\_BCLKOdCas9\_AAVS\_rep1,30639854,27773935  
NFYA\_CUTRUN\_BCLKOdCas9\_AAVS\_rep2,15000000,10369371  
NFYA\_CUTRUN\_BCLKOHDP2\_rep1,43920791,40823178  
NFYA\_CUTRUN\_BCLKOHDP2\_rep2,34270965,29805299  
NFYA\_CUTRUN\_CD34\_AAVS32\_rep1,19057148,15307722  
NFYA\_CUTRUN\_CD34\_AAVS32\_rep2,14637450,13197549  
NFYA\_CUTRUN\_CD34\_AAVS72\_rep2,25988936,22767333  
NFYA\_CUTRUN\_CD34\_KO32\_rep1,17456600,15834599  
NFYA\_CUTRUN\_CD34\_KO32\_rep2,20485966,19147012  
NFYA\_CUTRUN\_CD34\_KO72\_rep2,9283584,8254157  
NFYA\_CUTRUN\_CD34\_shBCL,39674277,34823019

|                         |                                                                                                                                                                                                                                                                                                                                                                                                                                                                                                                                                                                                                                                                                                                                                                                                                                                                                                                                                                                                                                                                                                                                                                                                                       |
|-------------------------|-----------------------------------------------------------------------------------------------------------------------------------------------------------------------------------------------------------------------------------------------------------------------------------------------------------------------------------------------------------------------------------------------------------------------------------------------------------------------------------------------------------------------------------------------------------------------------------------------------------------------------------------------------------------------------------------------------------------------------------------------------------------------------------------------------------------------------------------------------------------------------------------------------------------------------------------------------------------------------------------------------------------------------------------------------------------------------------------------------------------------------------------------------------------------------------------------------------------------|
|                         | NFYA_CUTRUN_CD34_shCtr,33222760,28880730<br>NFYA_CUTRUN_CD34_shNFYA,47578352,42263166<br>NFYA_CUTRUN_cloneA9d,23624493,15919597<br>NFYA_CUTRUN_cloneB2p,18004344,9288219<br>NFYA_CUTRUN_cloneB6p,14853815,3893985<br>NFYA_CUTRUN_cloneB7d,16272000,9493221<br>NFYA_CUTRUN_cloneB7p,29818667,16787151<br>NFYA_CUTRUN_cloneB8p,24889493,10095503<br>NFYA_CUTRUN_cloneC4p,15589029,9744071<br>NFYA_CUTRUN_cloneD10d,19563736,11344188<br>NFYA_CUTRUN_cloneE11p,10817294,3269153<br>NFYA_CUTRUN_cloneE1d,27306601,20014302<br>NFYA_CUTRUN_cloneE6p,18850494,13870224<br>NFYA_CUTRUN_cloneF11d,19154878,13213573<br>NFYA_CUTRUN_cloneG10p,10822717,3922287<br>NFYA_CUTRUN_cloneG8d,15036288,7312922<br>NFYA_CUTRUN_Cord_CD34,18609228,16381146<br>NFYA_CUTRUN_HDP1_rep1,28560486,26192514<br>NFYA_CUTRUN_HDP1_rep2,25445084,19593285<br>NFYA_CUTRUN_HDP2_rep1,31546932,29406956<br>NFYA_CUTRUN_HDP2_rep2,32928500,29206382<br>TBP_CUTRUN_CD34_AAVS32_rep1,20255744,17996530<br>TBP_CUTRUN_CD34_AAVS32_rep2,16770308,15517167<br>TBP_CUTRUN_CD34_AAVS72_rep2,28013959,24829072<br>TBP_CUTRUN_CD34_KO32_rep1,21978816,20072549<br>TBP_CUTRUN_CD34_KO32_rep2,24492508,22990688<br>TBP_CUTRUN_CD34_KO72_rep2,20770535,18348659 |
| Antibodies              | BCL11A, ab191401, Abcam, for CUT&RUN; NFYA, sc-17753, Santa Cruz Biotechnology, for CUT&RUN; NFYA, ab139402, Abcam, for CHIP-seq; TBP, ab220788, Abcam, for CUT&RUN                                                                                                                                                                                                                                                                                                                                                                                                                                                                                                                                                                                                                                                                                                                                                                                                                                                                                                                                                                                                                                                   |
| Peak calling parameters | Bowtie2 was used to align sequences to hg19, and MACS2 was used to call peaks using -f BAMPE -q 0.01 -B -SPMR. Duplicates were retained for CUT&RUN analysis due to the fact that pA-MN digestion (like Tn5 transposition) frequently results in the same DNA fragments.                                                                                                                                                                                                                                                                                                                                                                                                                                                                                                                                                                                                                                                                                                                                                                                                                                                                                                                                              |
| Data quality            | Raw data was quality checked with FastQC. Low quality reads and unpaired reads were removed by trimmomatic. Additional read through adapters were trimmed with kseq script in CUT&RUNTools.                                                                                                                                                                                                                                                                                                                                                                                                                                                                                                                                                                                                                                                                                                                                                                                                                                                                                                                                                                                                                           |
| Software                | CUT&RUNTools was used to process CHIP-seq and CUT&RUN data. CUT&RUNTools integrates the following softwares: Trimmomatic 0.36, Bowtie 2.2.9, Samtools 1.3.1, Picard 2.8.0, MACS 2.1.1, MEME, Bedops 2.4.30, Bedtools 2.26.0.                                                                                                                                                                                                                                                                                                                                                                                                                                                                                                                                                                                                                                                                                                                                                                                                                                                                                                                                                                                          |

## Flow Cytometry

### Plots

Confirm that:

- The axis labels state the marker and fluorochrome used (e.g. CD4-FITC).
- The axis scales are clearly visible. Include numbers along axes only for bottom left plot of group (a 'group' is an analysis of identical markers).
- All plots are contour plots with outliers or pseudocolor plots.
- A numerical value for number of cells or percentage (with statistics) is provided.

### Methodology

|                           |                                                                                                                                                                                                                                                                                                                                                                                                                                                                                                                                                                                                                            |
|---------------------------|----------------------------------------------------------------------------------------------------------------------------------------------------------------------------------------------------------------------------------------------------------------------------------------------------------------------------------------------------------------------------------------------------------------------------------------------------------------------------------------------------------------------------------------------------------------------------------------------------------------------------|
| Sample preparation        | intracellular staining was performed by fixing cells with 0.05% glutaraldehyde (grade II) (Sigma) for 10 min at room temperature. Cells were centrifuged for 5 min at 600x g and then resuspended in 0.1% Triton X-100 (Life Technologies) for 5 min at room temperature for permeabilization. Triton X-100 was diluted with phosphate buffered saline (PBS) with 0.1% BSA and then centrifuged at 600x g for 15 min. Cells were stained with antibodies for HbF (clone HbF-1 with FITC or APC conjugation; Life Technologies) for 20 min in the dark. Cells were washed to remove unbound antibody before flow cytometry. |
| Instrument                | BD Accuri™ C6 Flow Cytometer                                                                                                                                                                                                                                                                                                                                                                                                                                                                                                                                                                                               |
| Software                  | Data were collected using built in software in BD Accuri™ C6 Flow Cytometer and analyzed with FlowJo V10                                                                                                                                                                                                                                                                                                                                                                                                                                                                                                                   |
| Cell population abundance | 10000-50000 cells were analyzed. Dead cells or doublets were excluded with the gating strategy described below.                                                                                                                                                                                                                                                                                                                                                                                                                                                                                                            |

Gating strategy

FSC/SSC was used to exclude dead cells. FSC-A/FSC-H were used to select single cells. FL1-A channel recorded the FITC fluorescence. Positive and negative populations were defined according to 1) a non-stained sample as negative control. 2) an HbF expressing cell as positive control. 3) an obvious separation of HbF+ and HbF- populations.

Tick this box to confirm that a figure exemplifying the gating strategy is provided in the Supplementary Information.
