# Supplementary material
Source: PubMed Central journal article supplement (PMC8038971)

Short exposure

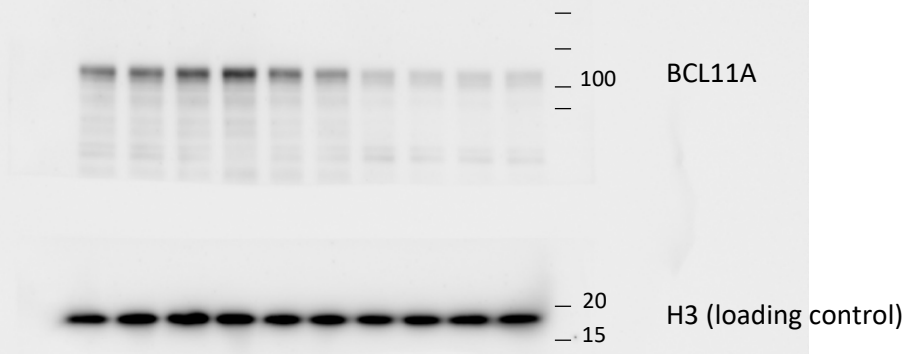

Long exposure

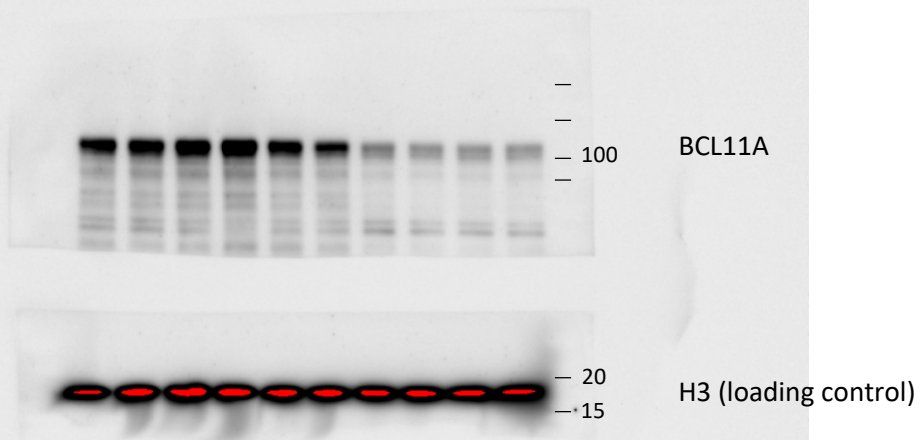

Supplement: NIHMS1665600-supplement-1665600_SourceDataFig4.pdf [file NIHMS1665600-supplement-1665600_SourceDataFig4.pdf]

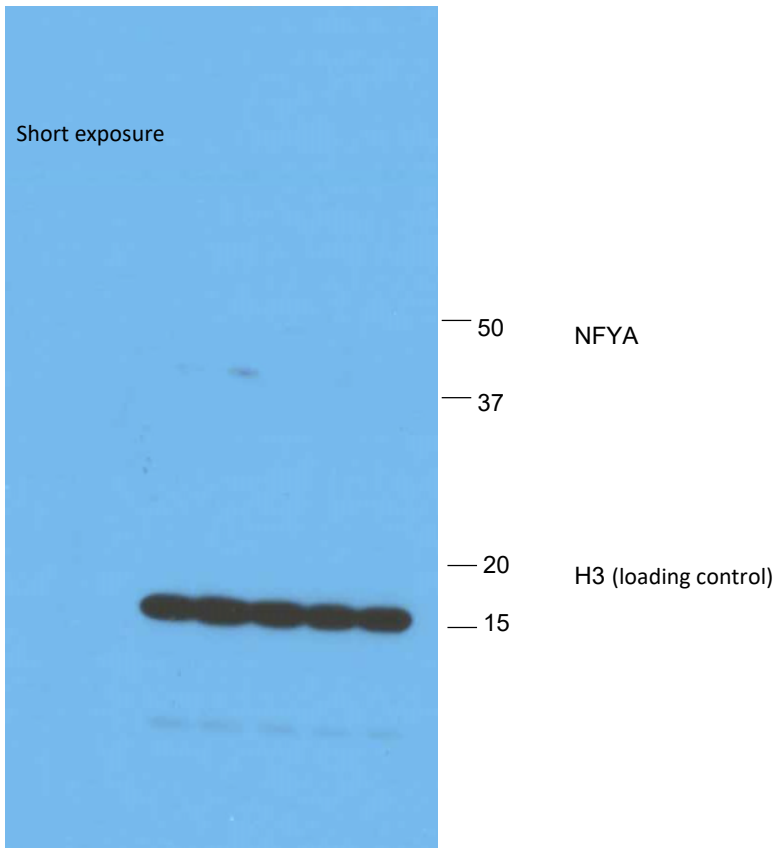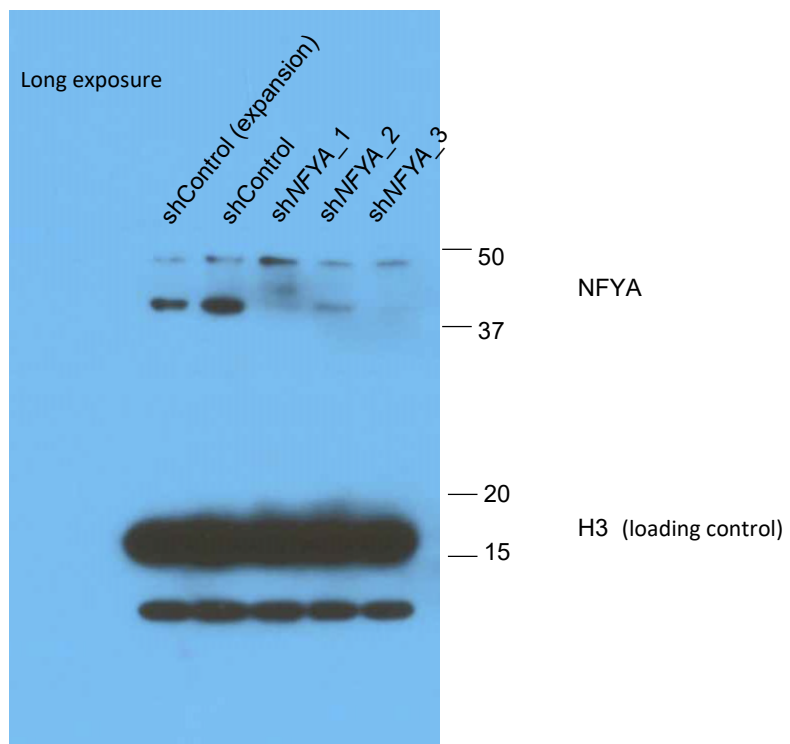

Supplement: NIHMS1665600-supplement-1665600_SourceExtDataFig2.pdf [file NIHMS1665600-supplement-1665600_SourceExtDataFig2.pdf]

Short exposure

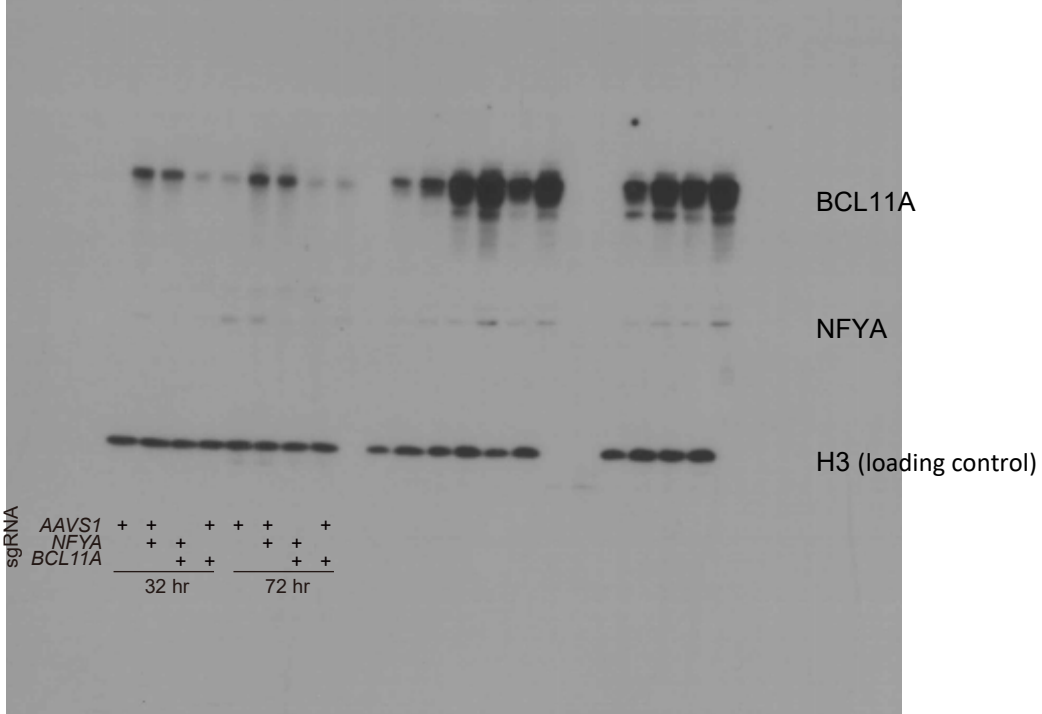

Long exposure

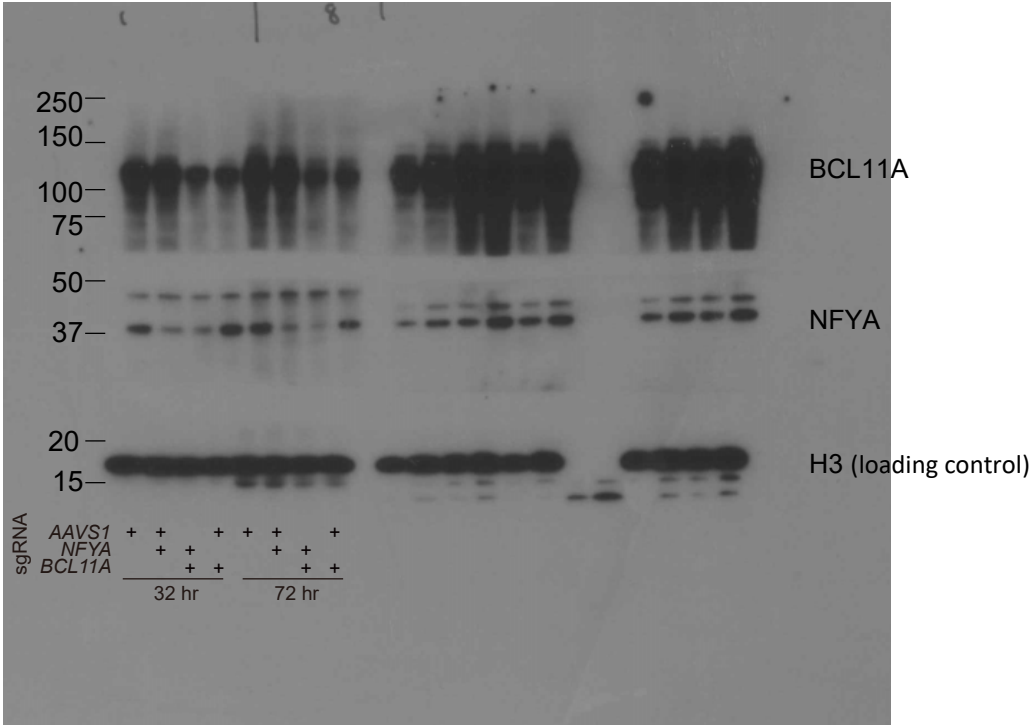

Supplement: NIHMS1665600-supplement-1665600_SourceExtDataFig5.pdf [file NIHMS1665600-supplement-1665600_SourceExtDataFig5.pdf]
